# Supplementary material for: A theoretical prediction on the shear-induced phase transformation of TKX-50
Source: Royal Society of Chemistry journal article supplement (doi:10.1039/c7cp06363f), 2017-01-01
Supplement: c7cp06363f1.pdf [file c7cp06363f1.pdf]

---

## A Theoretical Prediction on the Shear-induced Phase Transformation of TKX-50

Zhipeng Lu,<sup>†,‡</sup> Xianggui Xue,<sup>†</sup> and Chaoyang Zhang<sup>\*†§</sup>

<sup>†</sup> *Institute of Chemical Materials, China Academy of Engineering Physics (CAEP), P. O. Box 919-327, Mianyang, Sichuan 621900, China.*

<sup>‡</sup> *Department of Mathematics and Physics, Officers College of CAPF, Chengdu, 610213, China.*

<sup>§</sup> *Beijing Computational Science Research Center, Beijing 100048, China.*

### Electronic Supplementary Information (ESI)

**Table S1. Fractional Coordinates of the BCPs and Symmetry Multiplicity of TKX-50.**

| HB kind      | D-H...A    | Fraction coordinate      | Symmetry Multiplicity |
|--------------|------------|--------------------------|-----------------------|
| Intralayered | O2-H2...O1 | (0.0980, 0.6366, 0.8555) | 4                     |
|              | N5-H4...O1 | (0.5208, 0.3856, 0.1074) | 4                     |
|              | N5-H1...O1 | (0.2279, 0.0210, 0.3905) | 4                     |
|              | N5-H3...N3 | (0.4340, 0.3461, 0.8217) | 4                     |
|              | N5-H1...N4 | (0.0511, 0.0790, 0.3554) | 4                     |
| Interlayered | N5-H3...N2 | (0.4111, 0.2539, 0.4467) | 4                     |
|              | N5-H3...O2 | (0.2212, 0.2277, 0.2821) | 4                     |
